# Supplementary material for: The Effect of Global Spread, Epidemiology, and Control Strategies on the Evolution of the GI-19 Lineage of Infectious Bronchitis Virus
Source: MDPI journal article supplement (doi:10.3390/v16030481), 2024-03-20

1

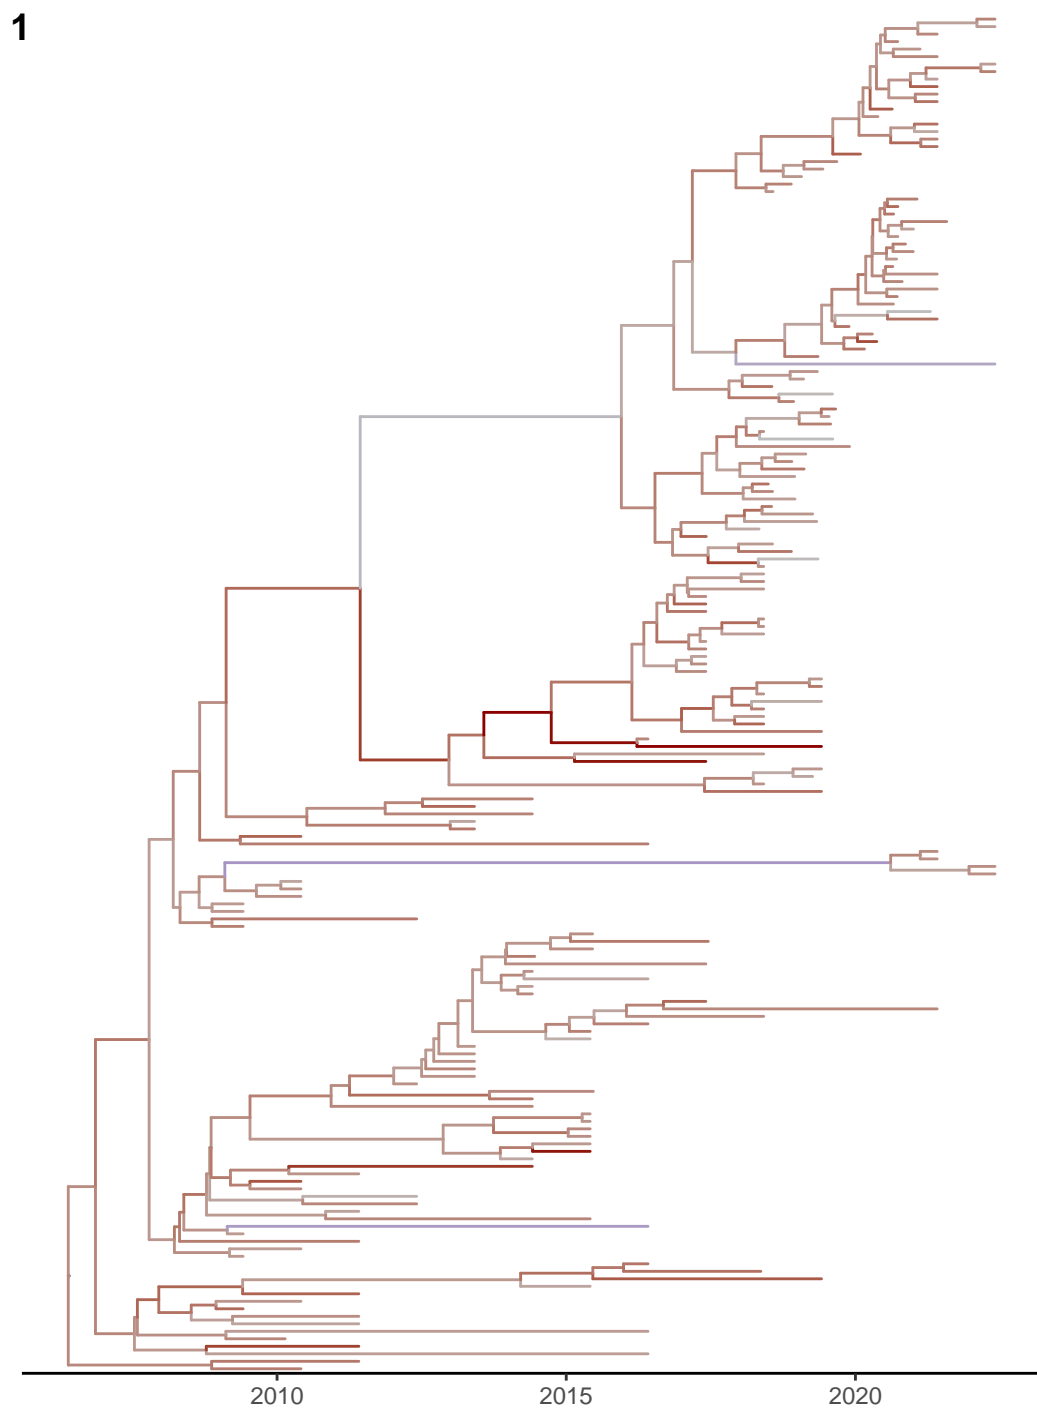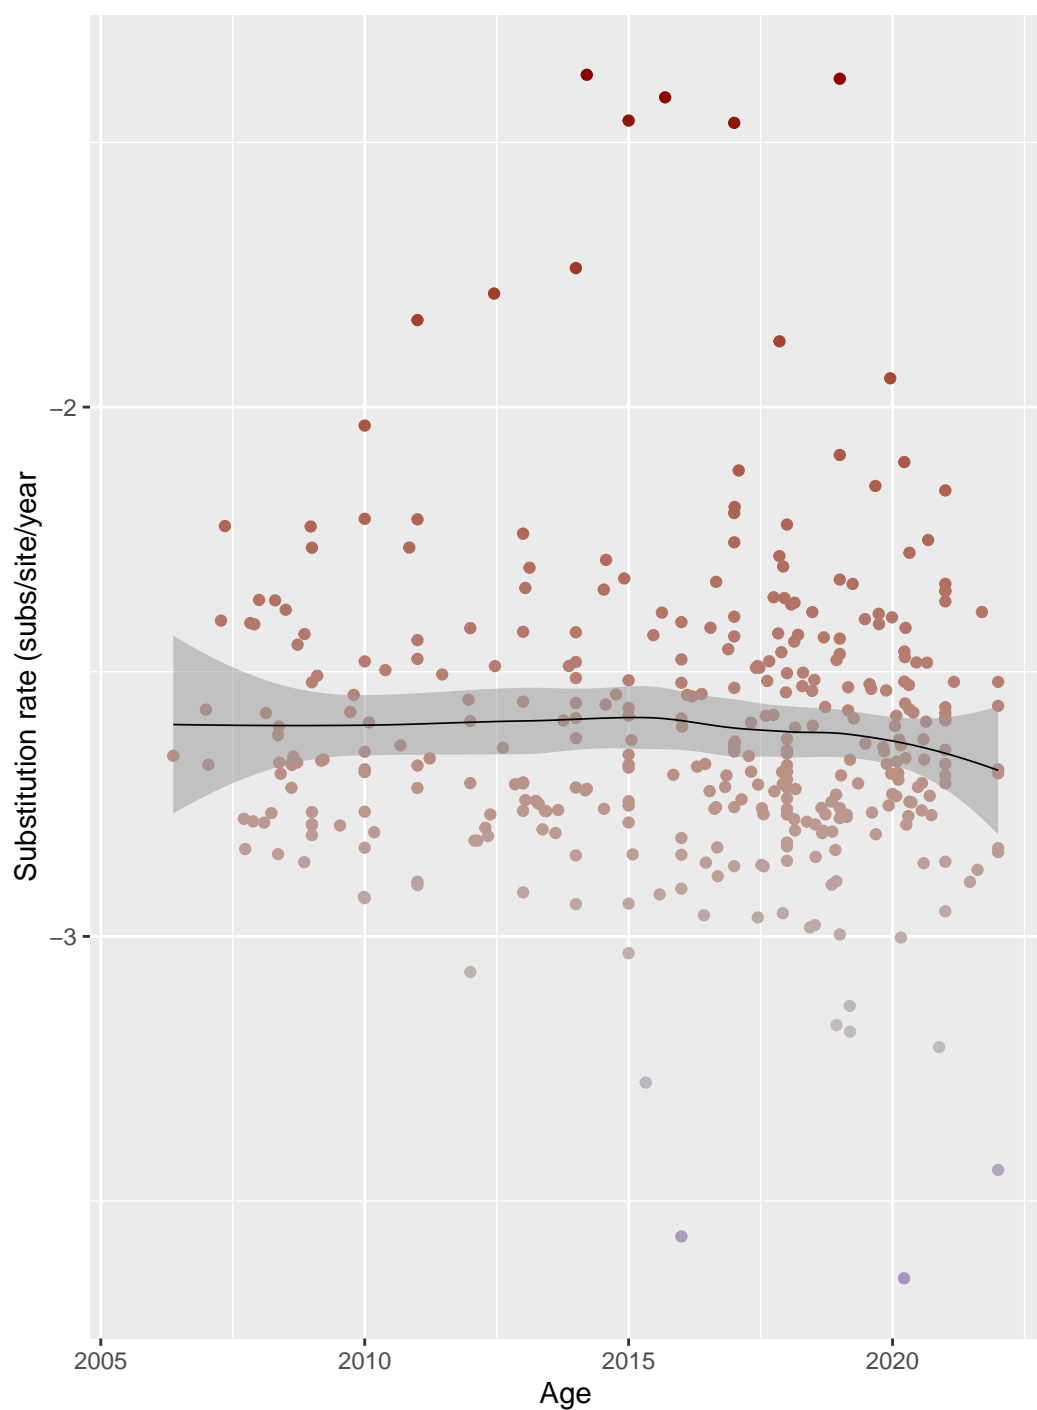

Substitution rate (subs/site/year)

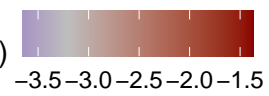

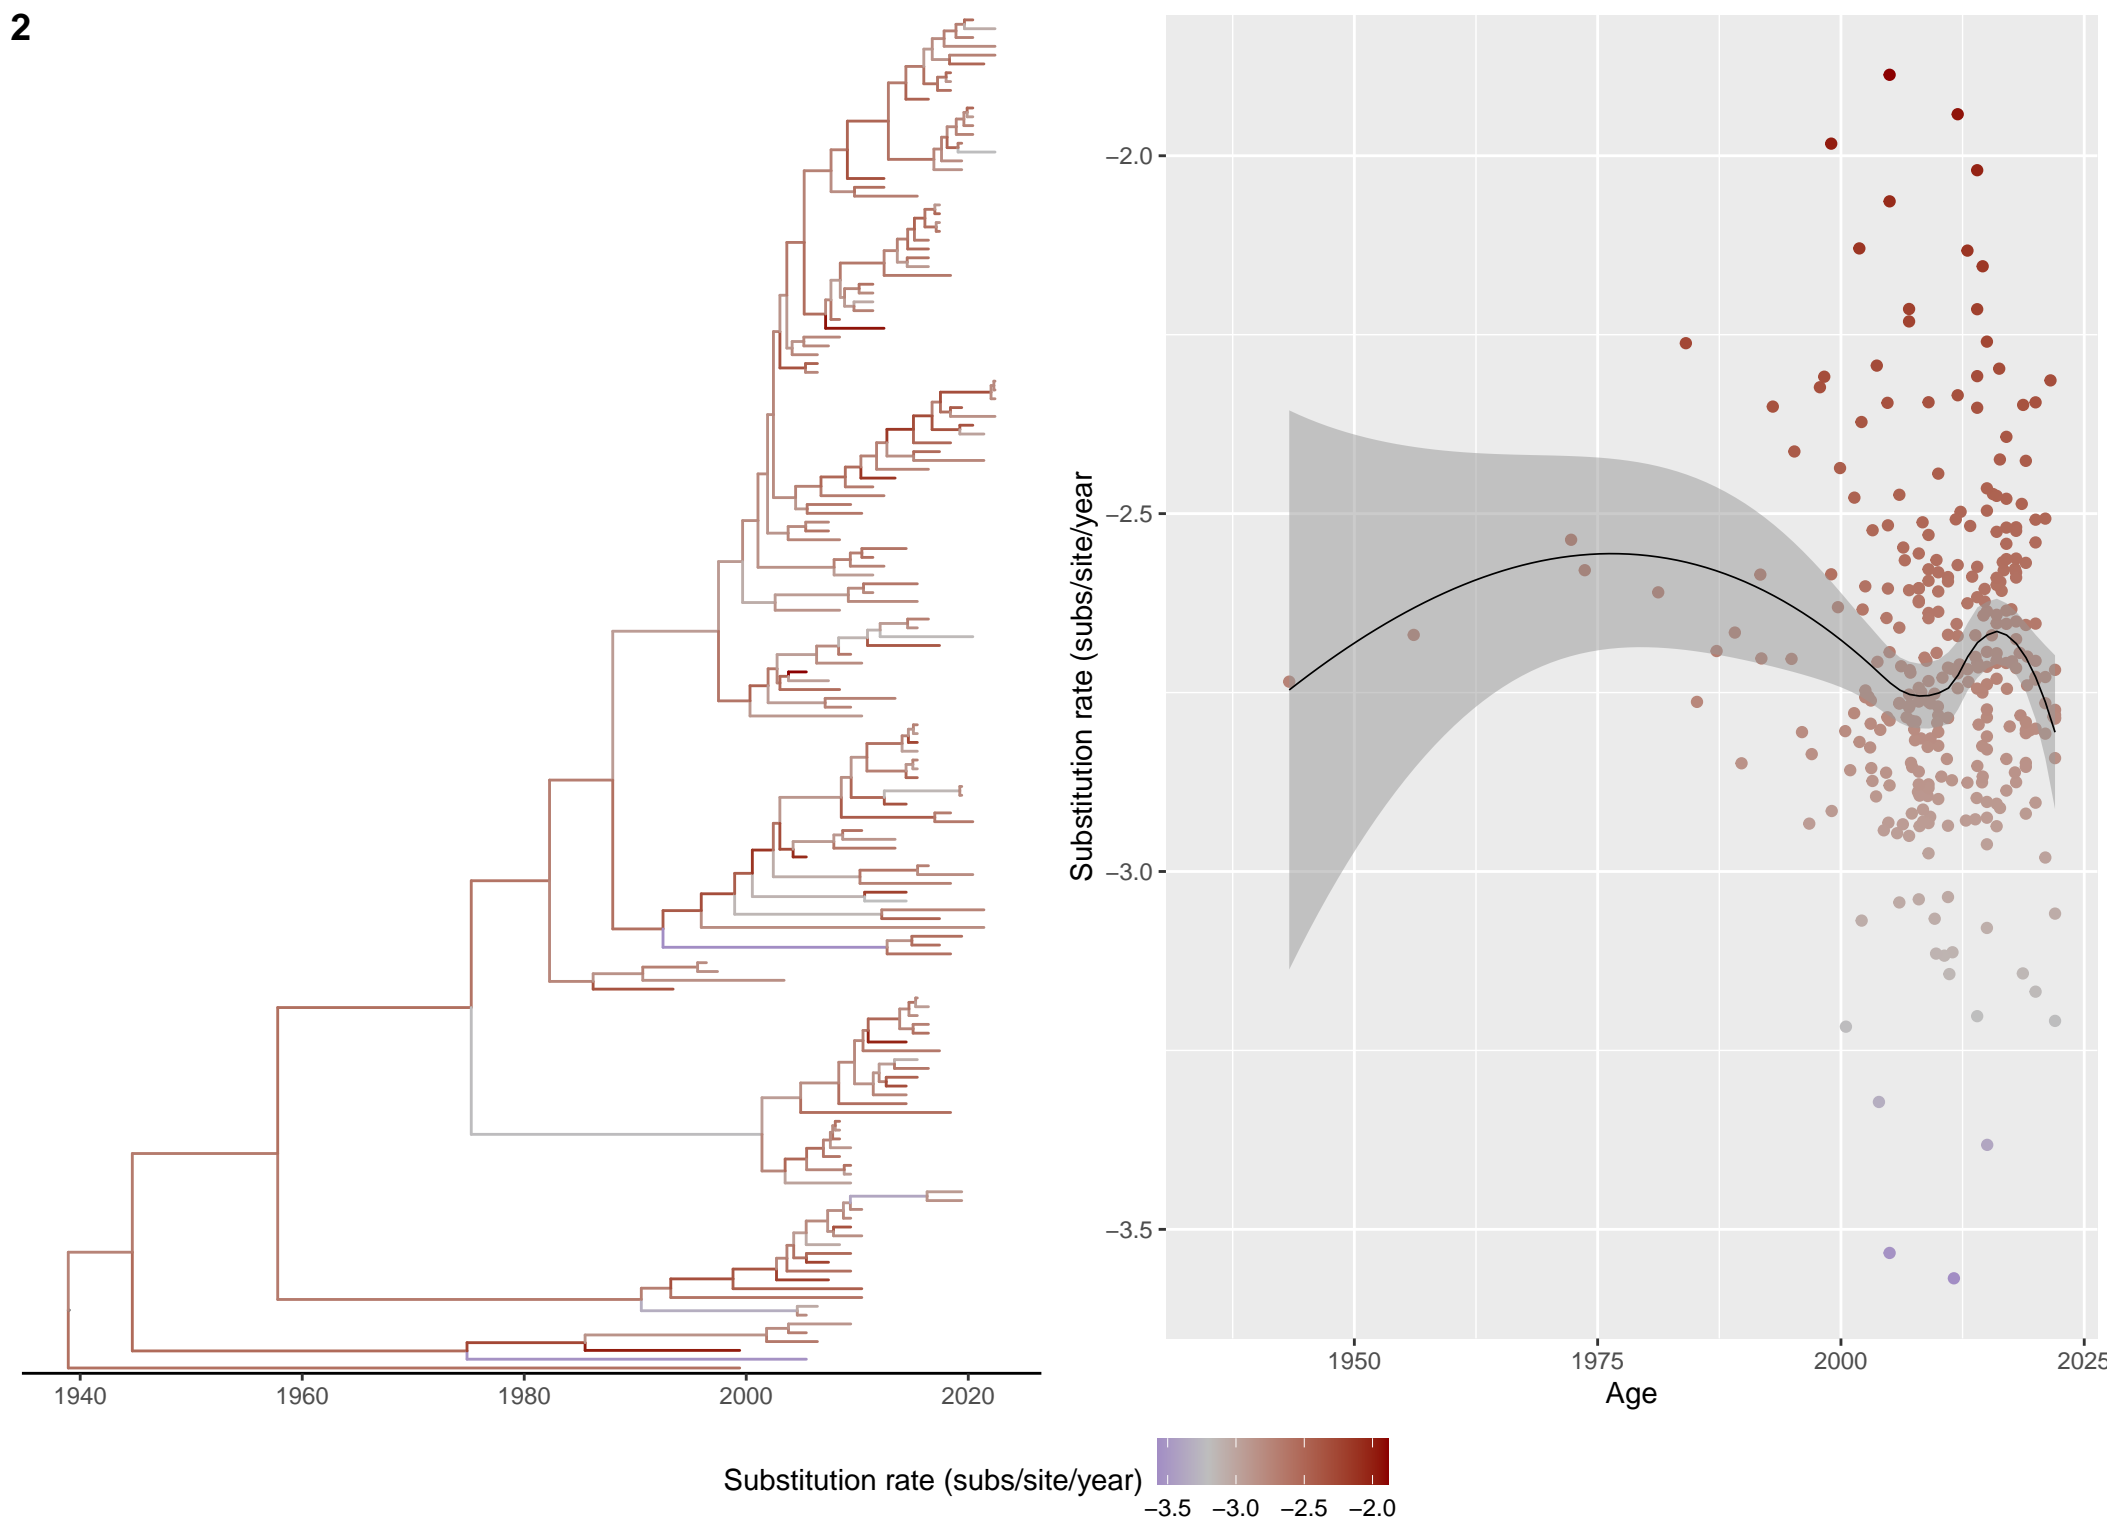

3

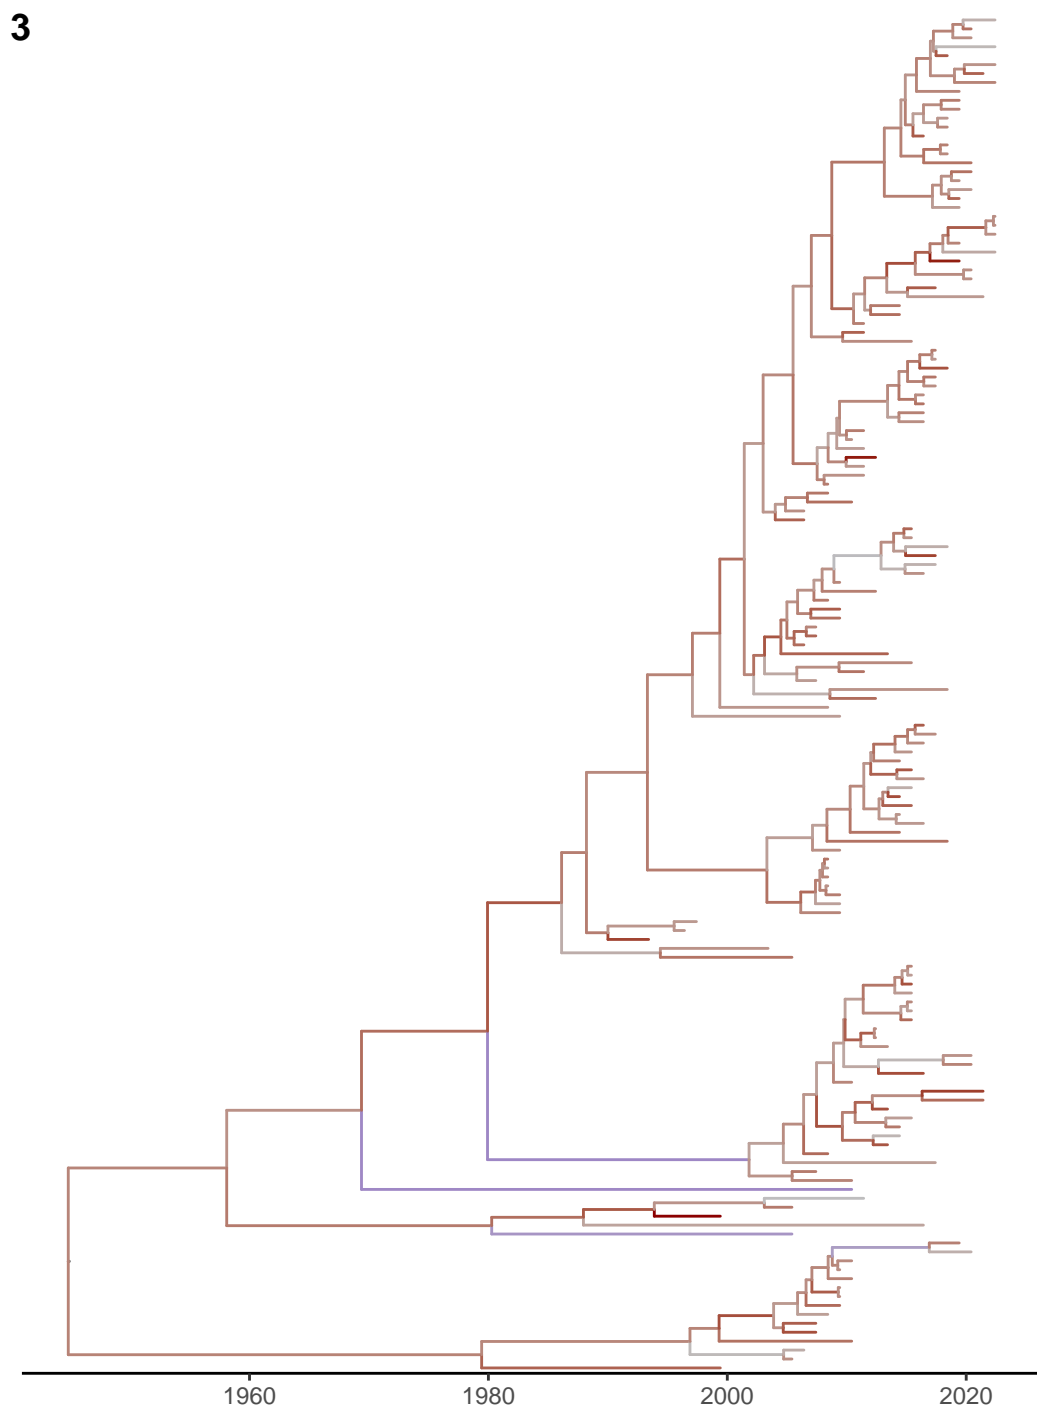

Substitution rate (subs/site/year)

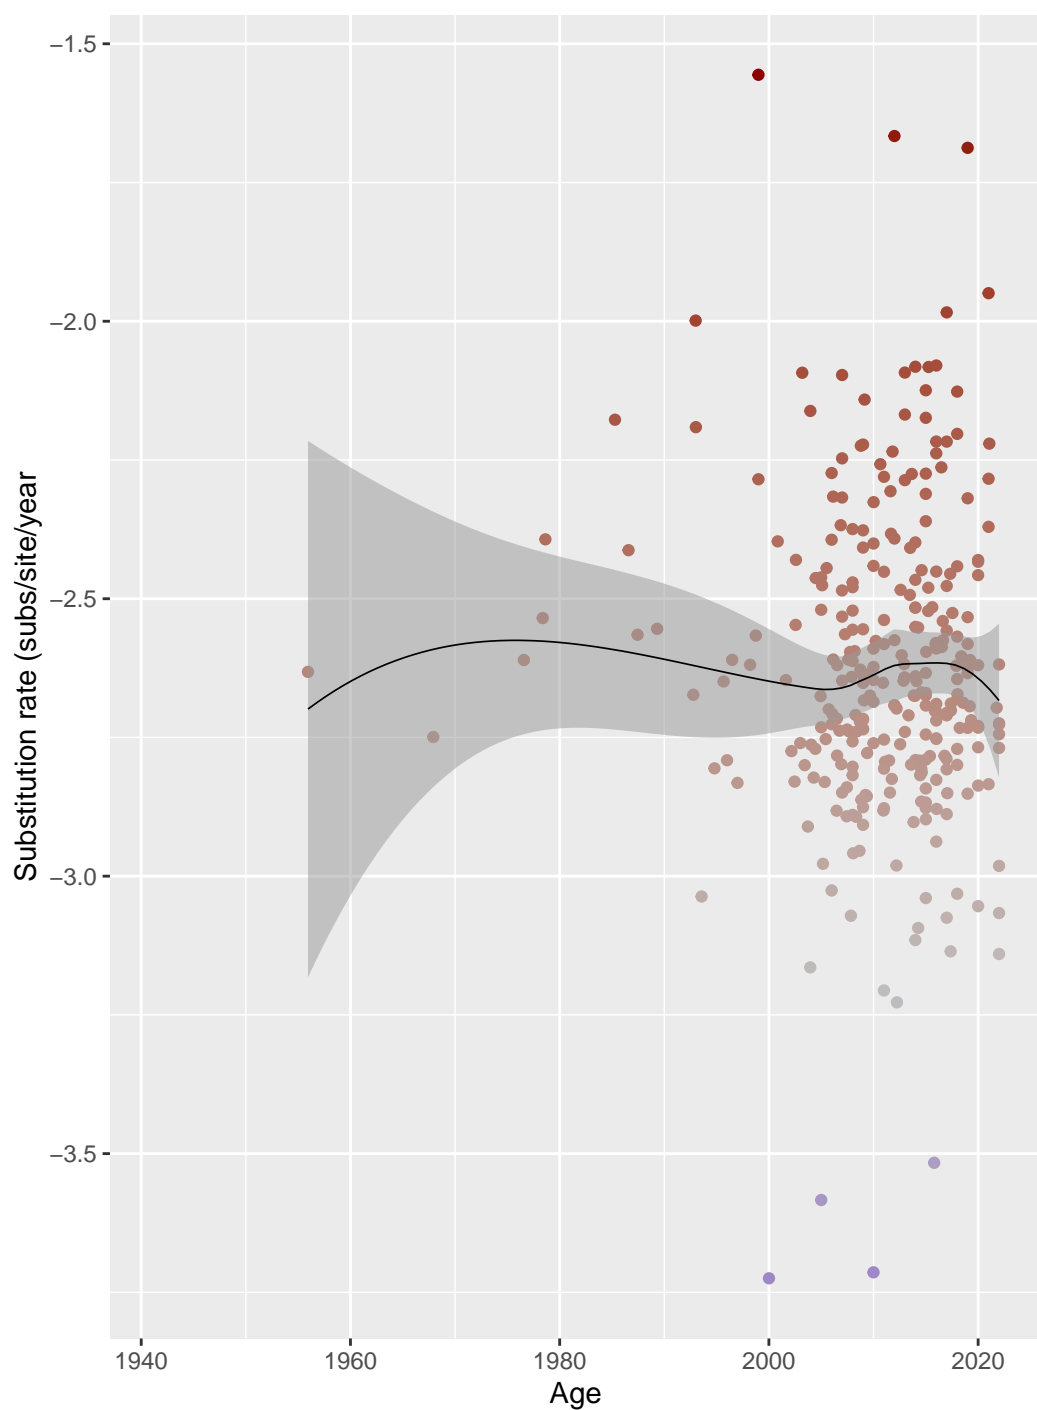

-3.5 -3.0 -2.5 -2.0

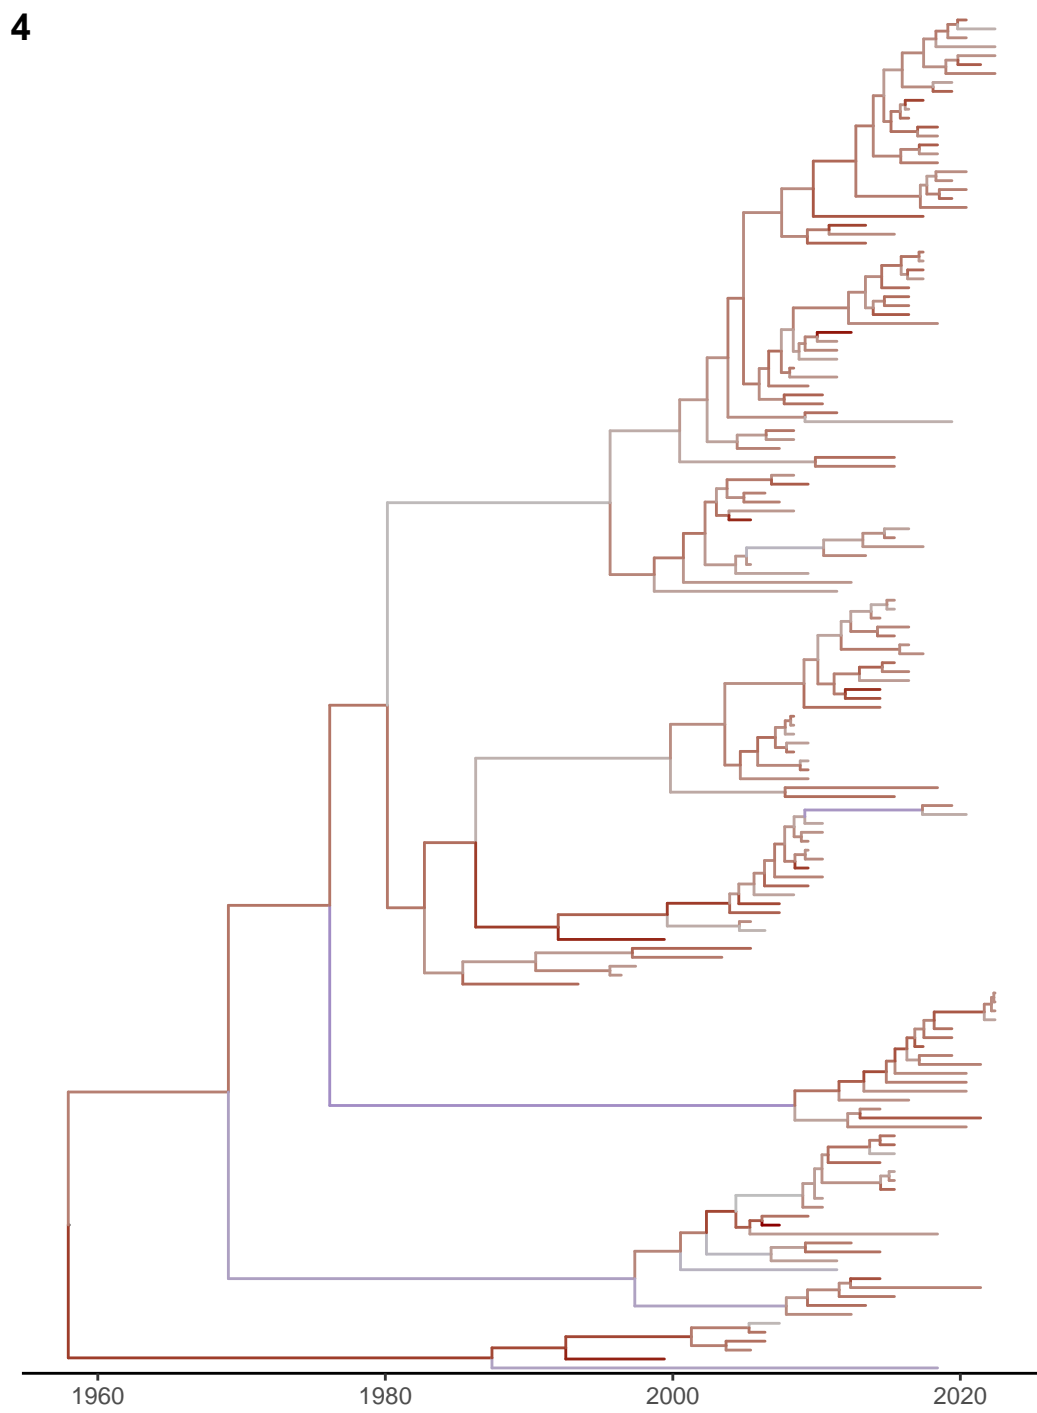

Substitution rate (subs/site/year)

-3.5 -3.0 -2.5 -2.0

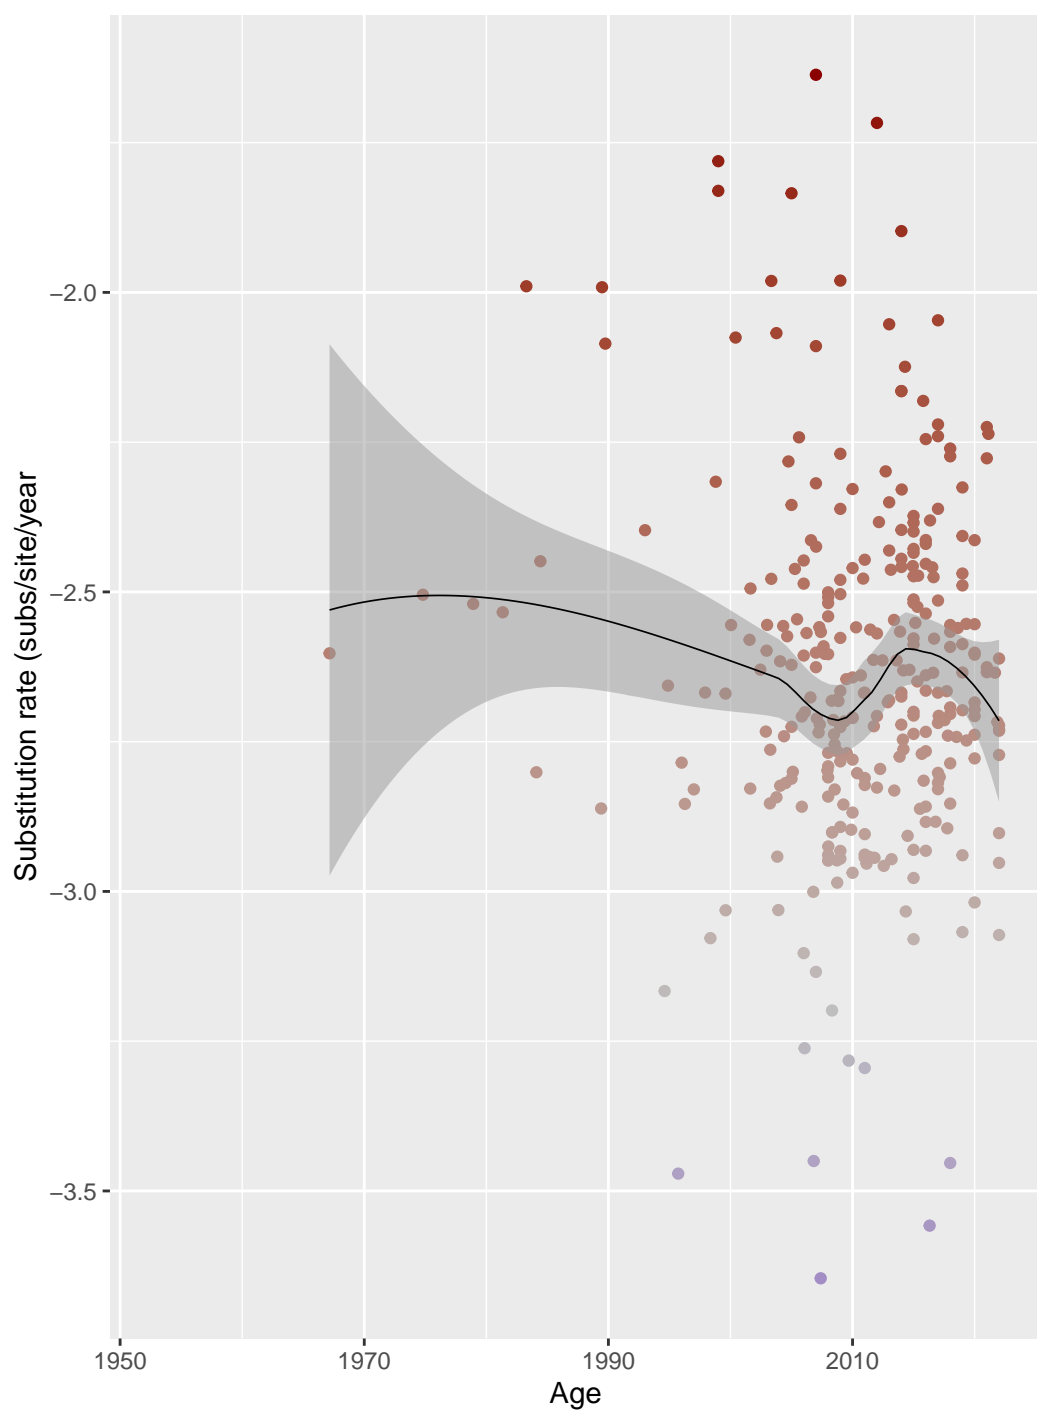

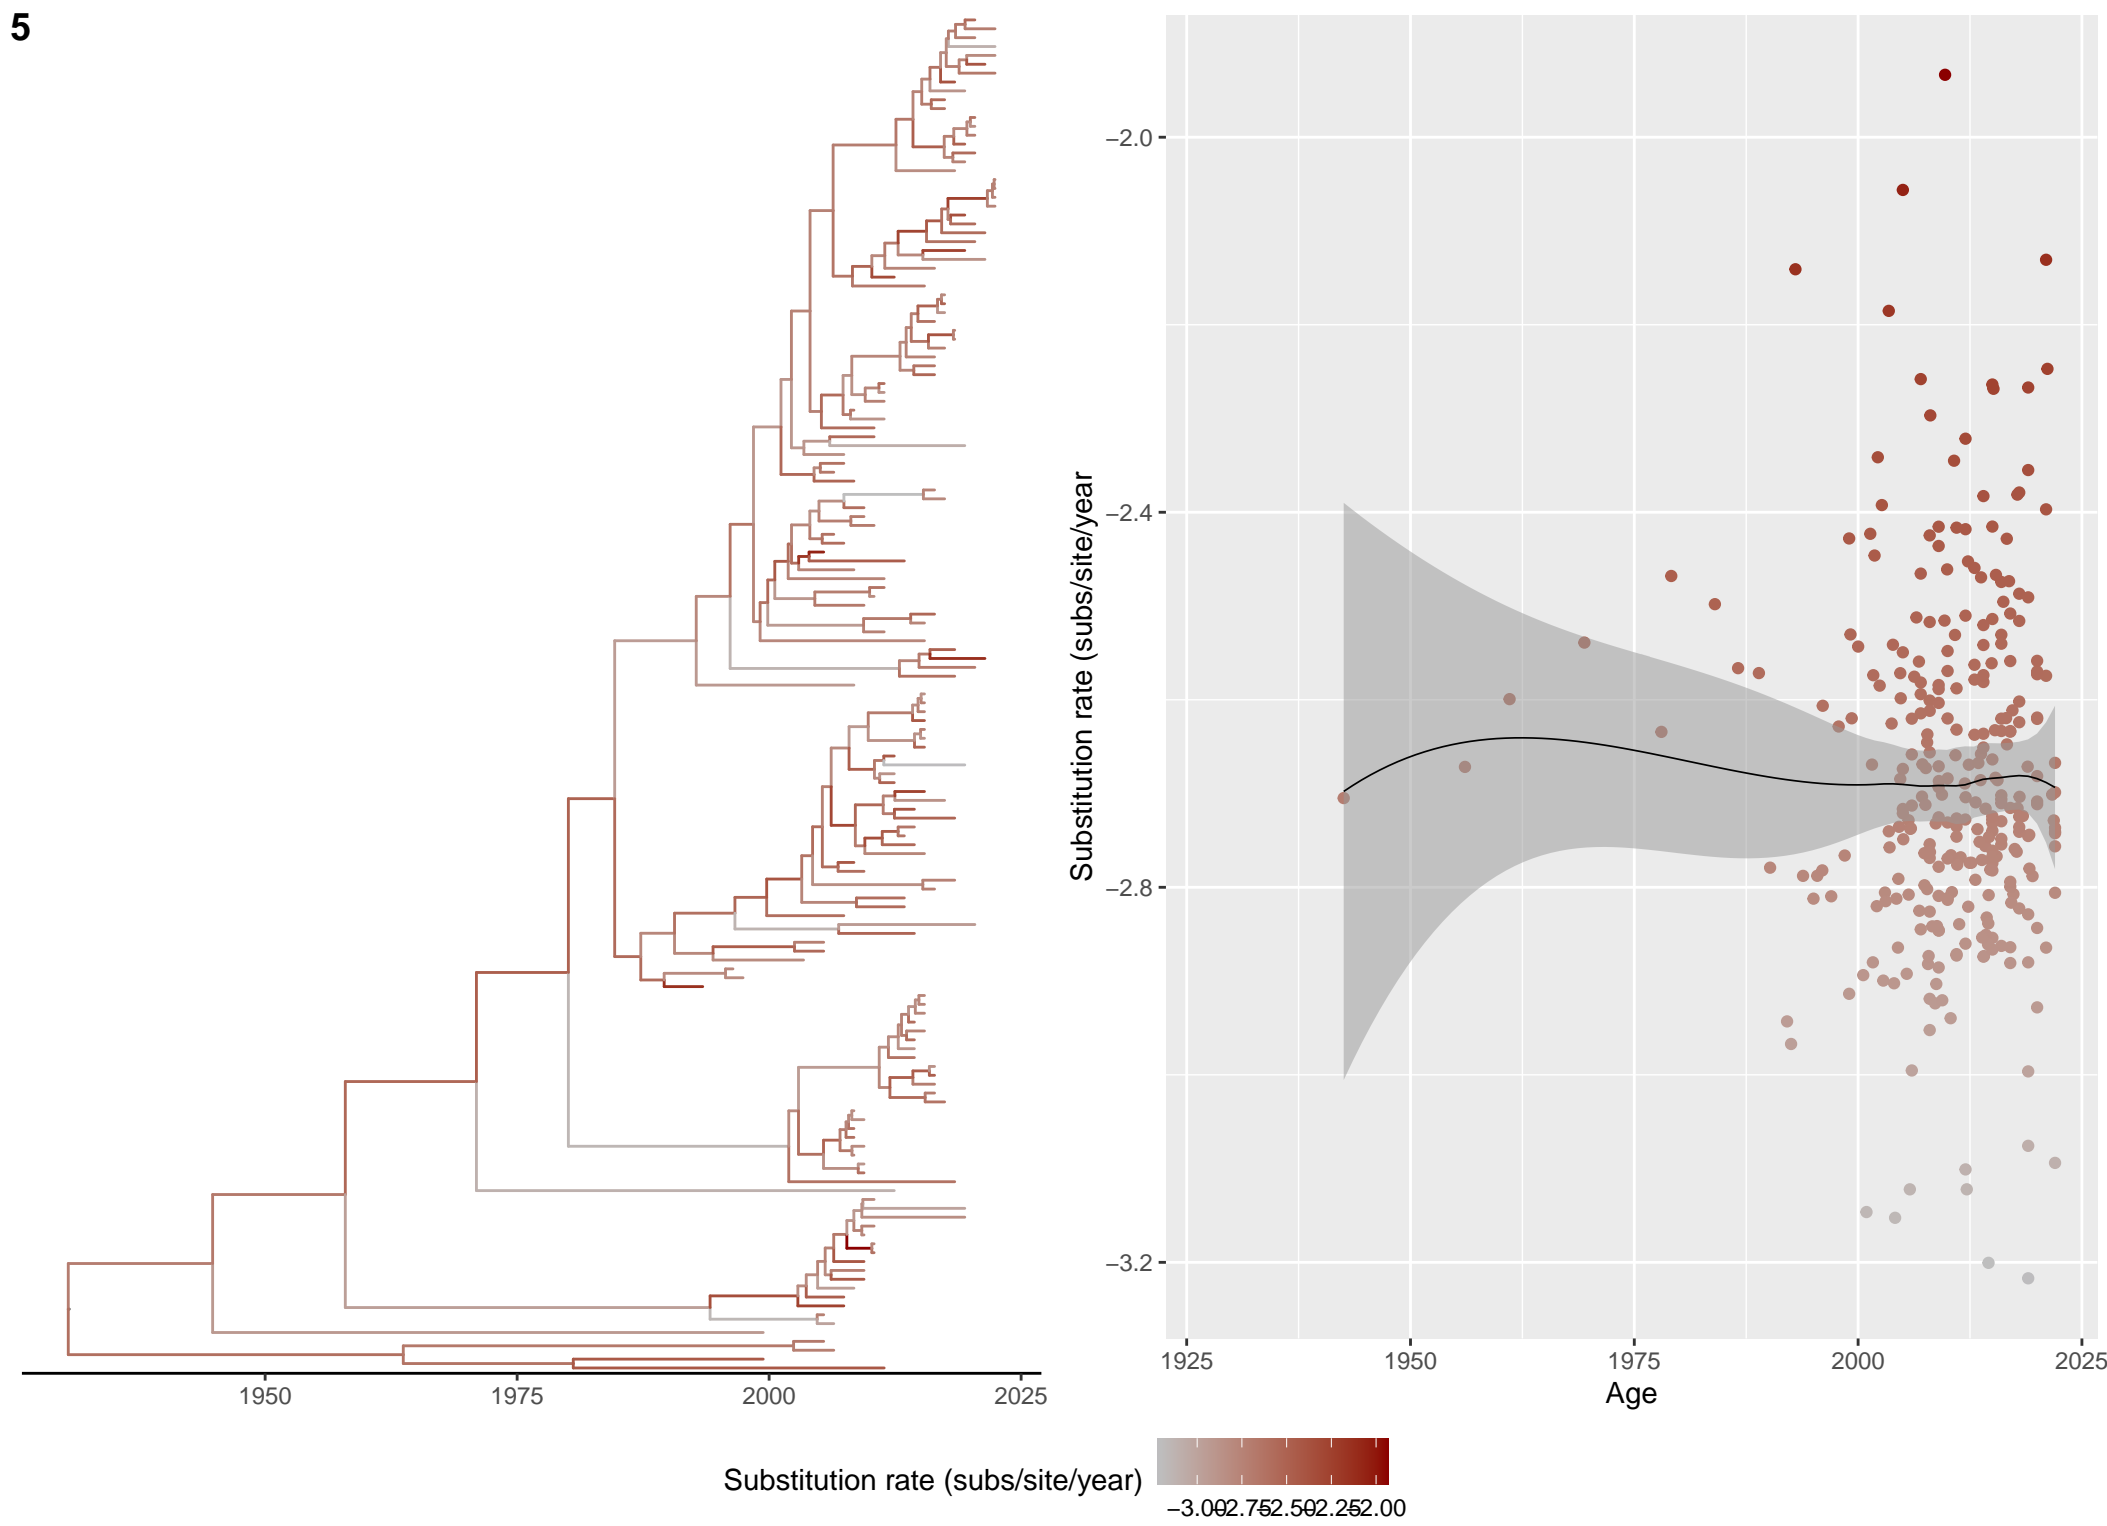

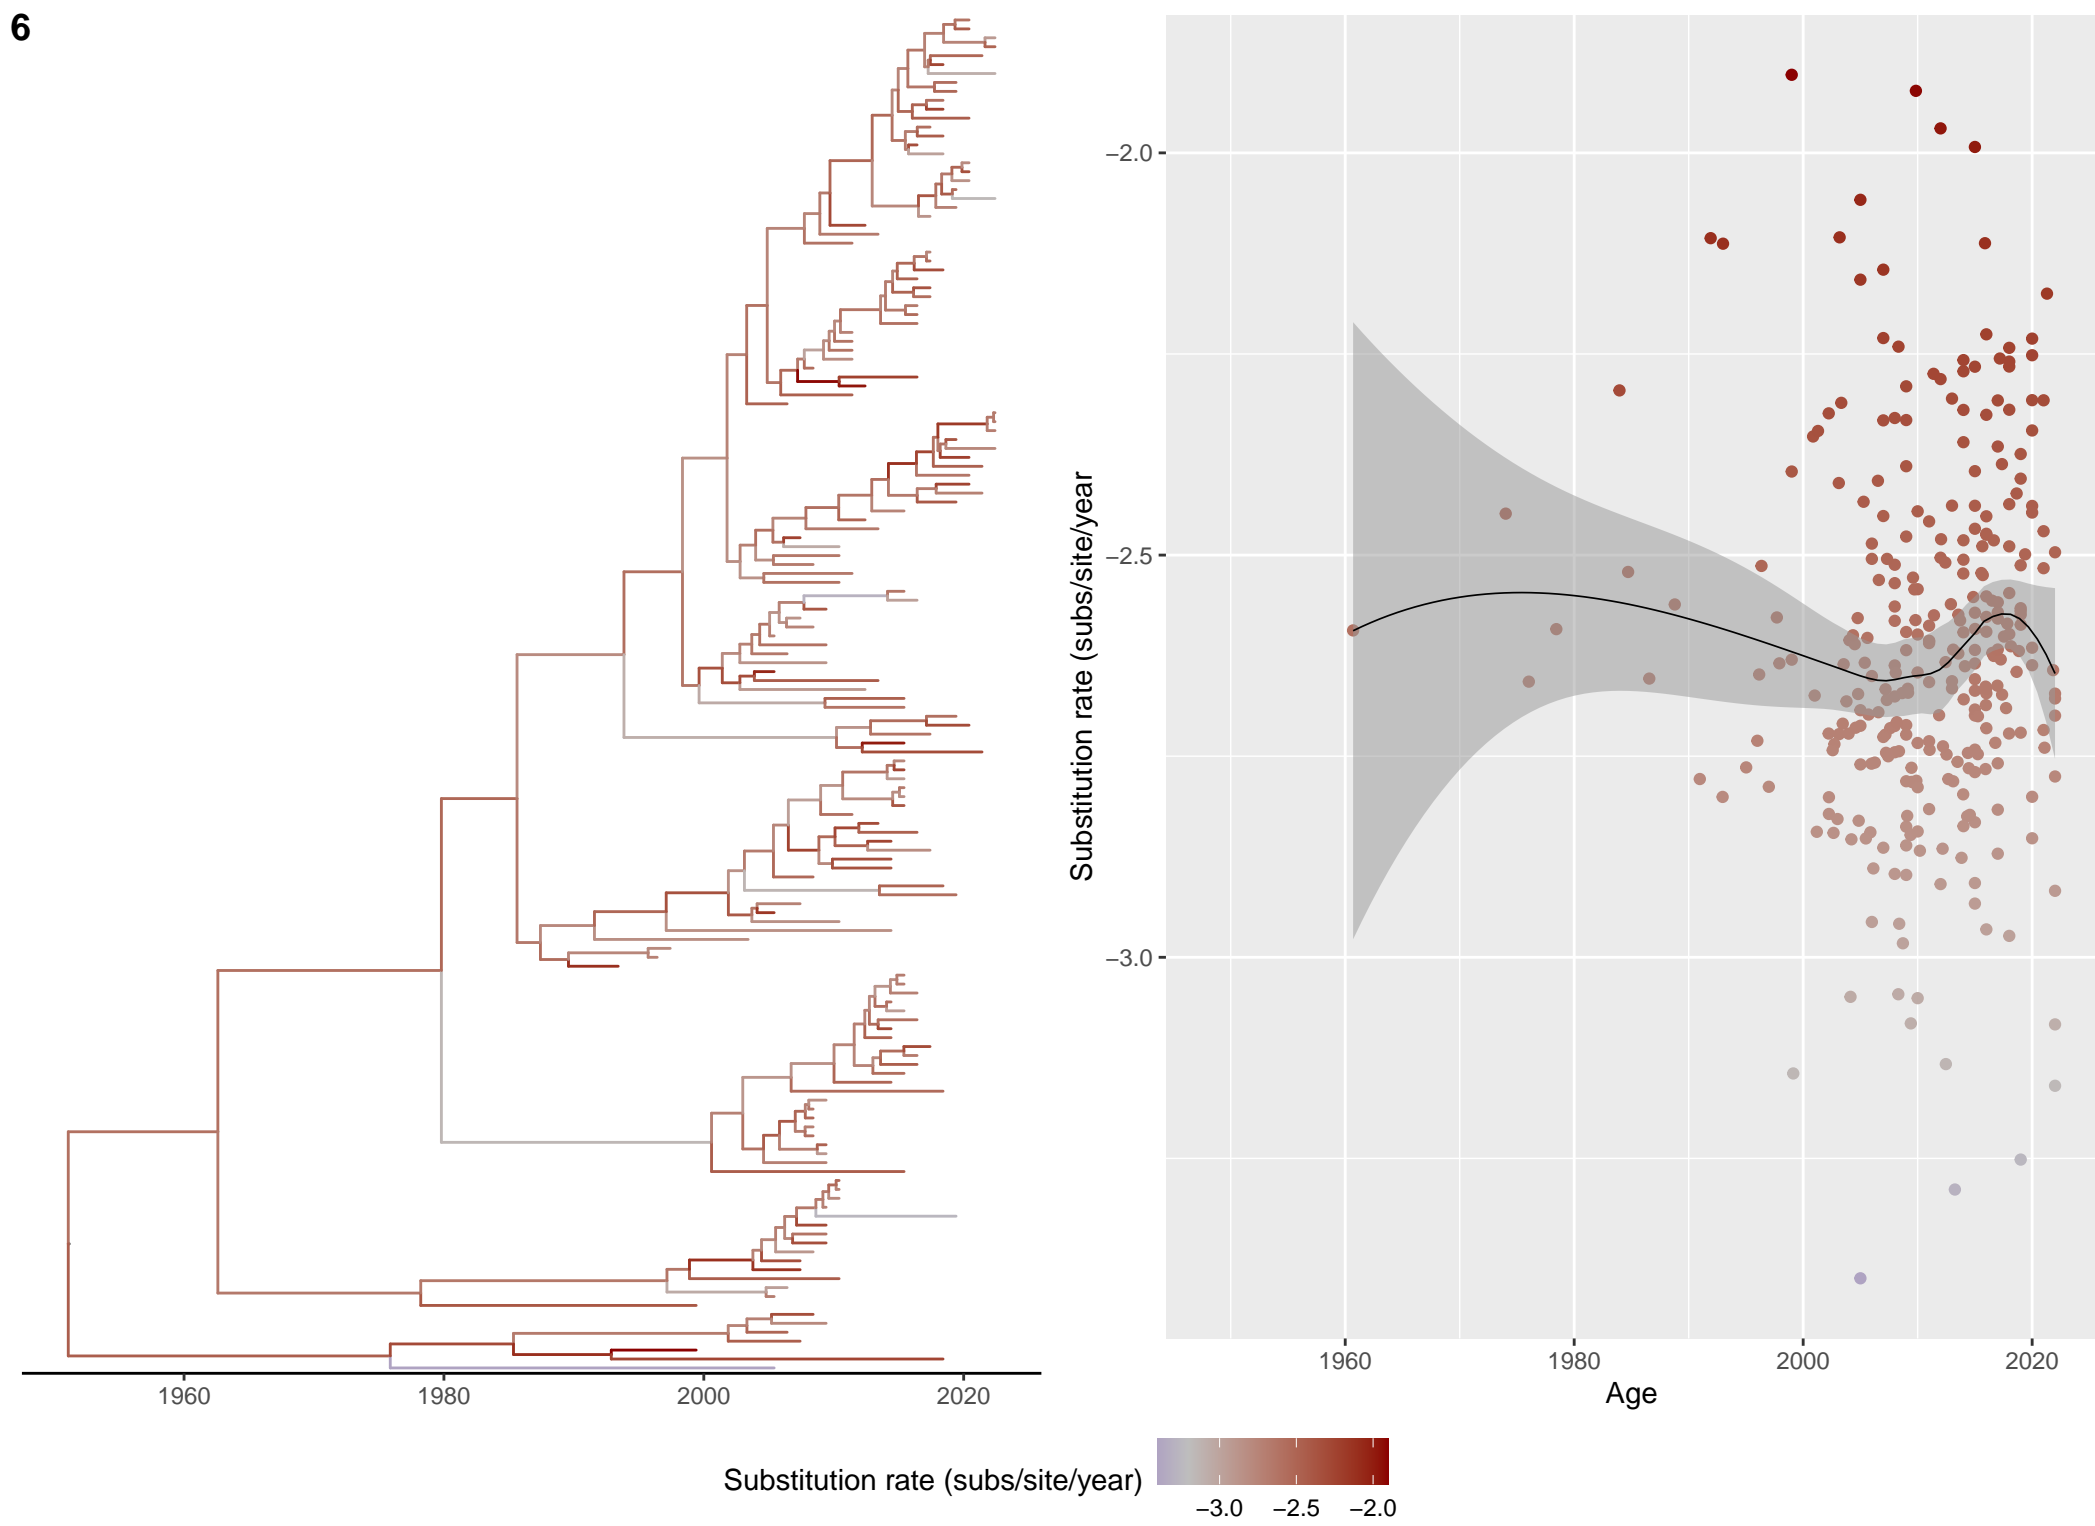

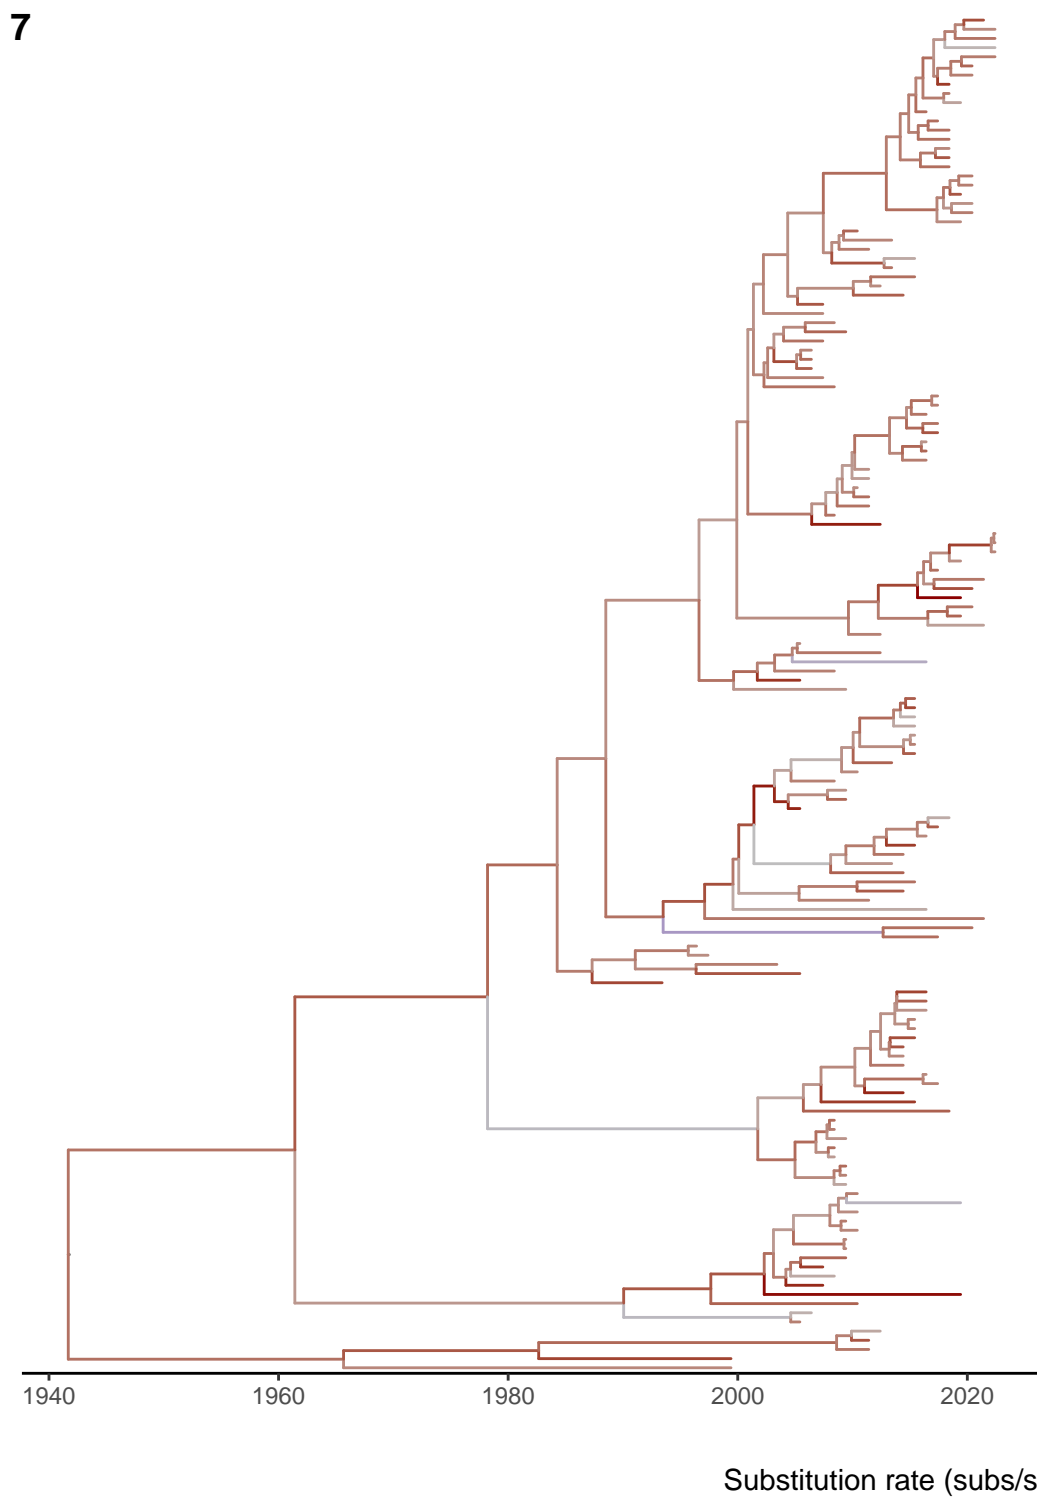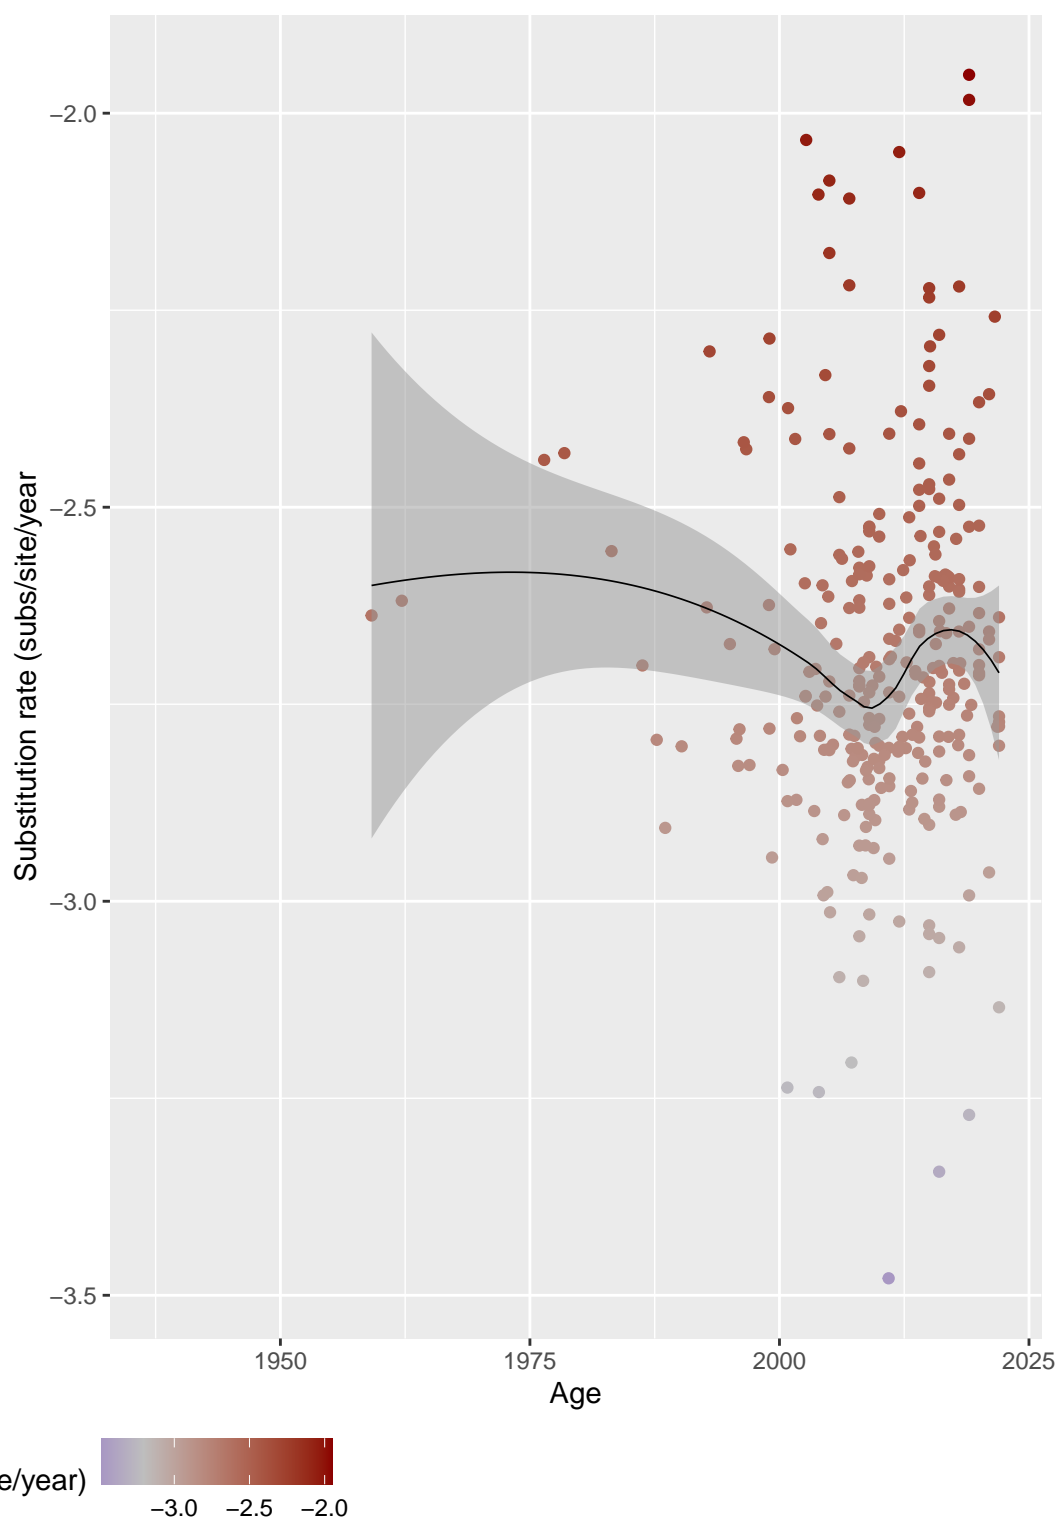

Supplement: s1 [file s1]
