# Supplementary figures and images for: The Effect of Global Spread, Epidemiology, and Control Strategies on the Evolution of the GI-19 Lineage of Infectious Bronchitis Virus
Source: MDPI journal article supplement (doi:10.3390/v16030481), 2024-03-20

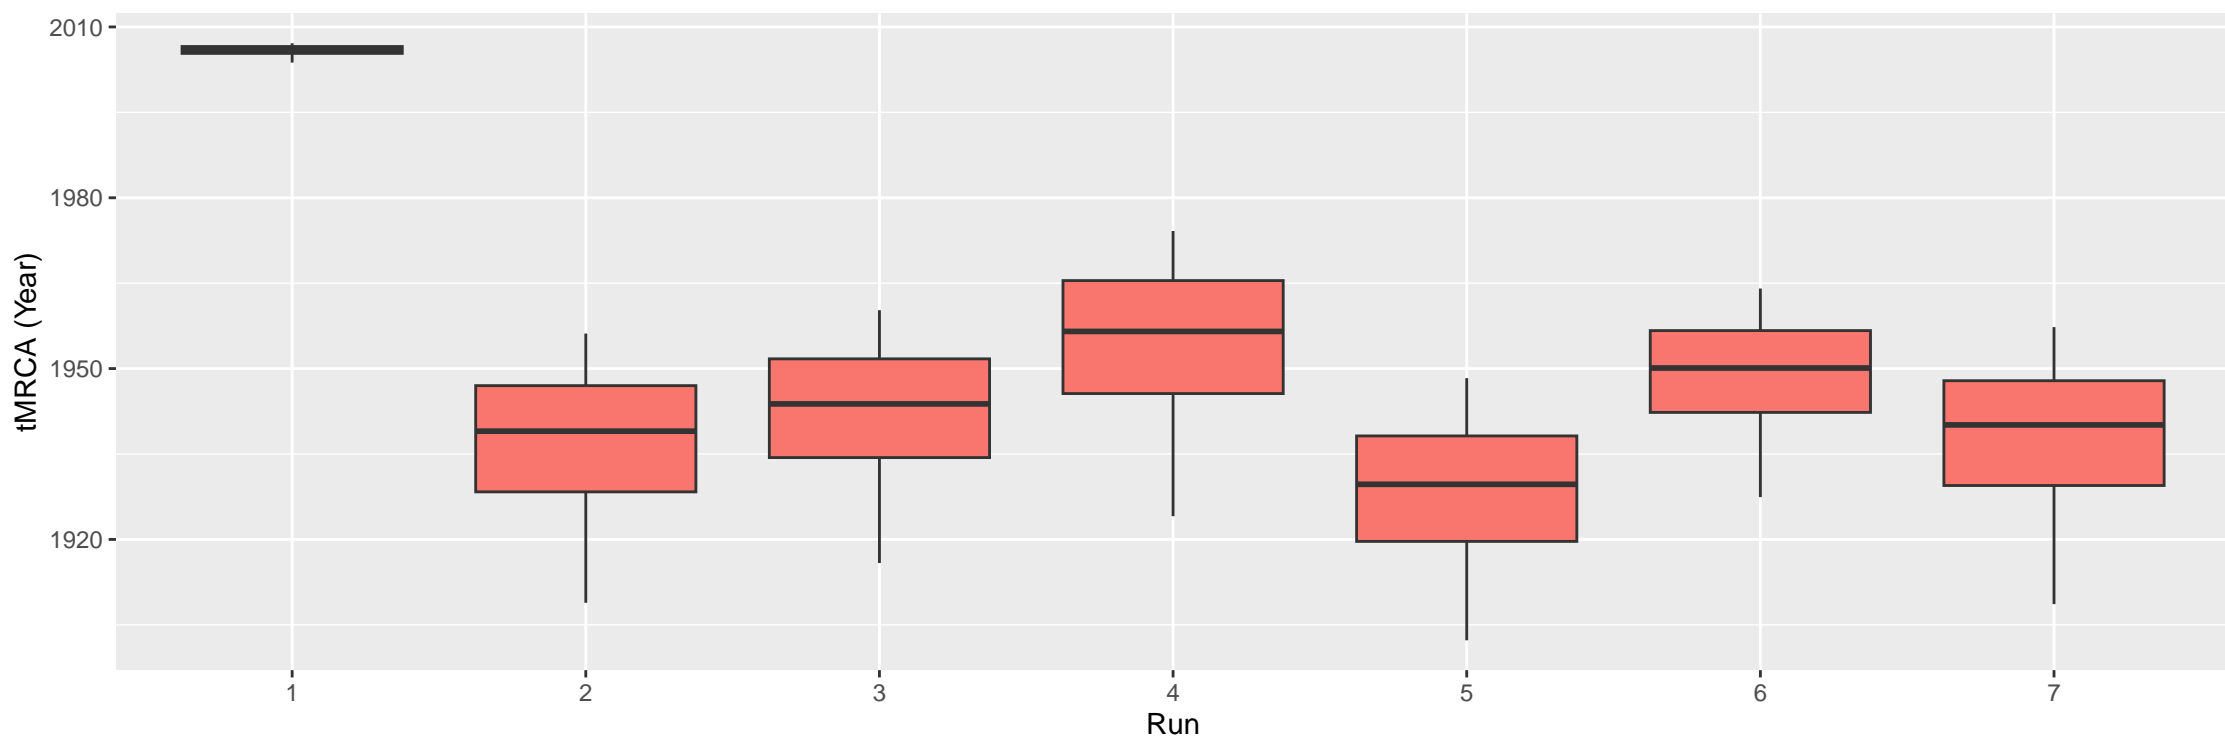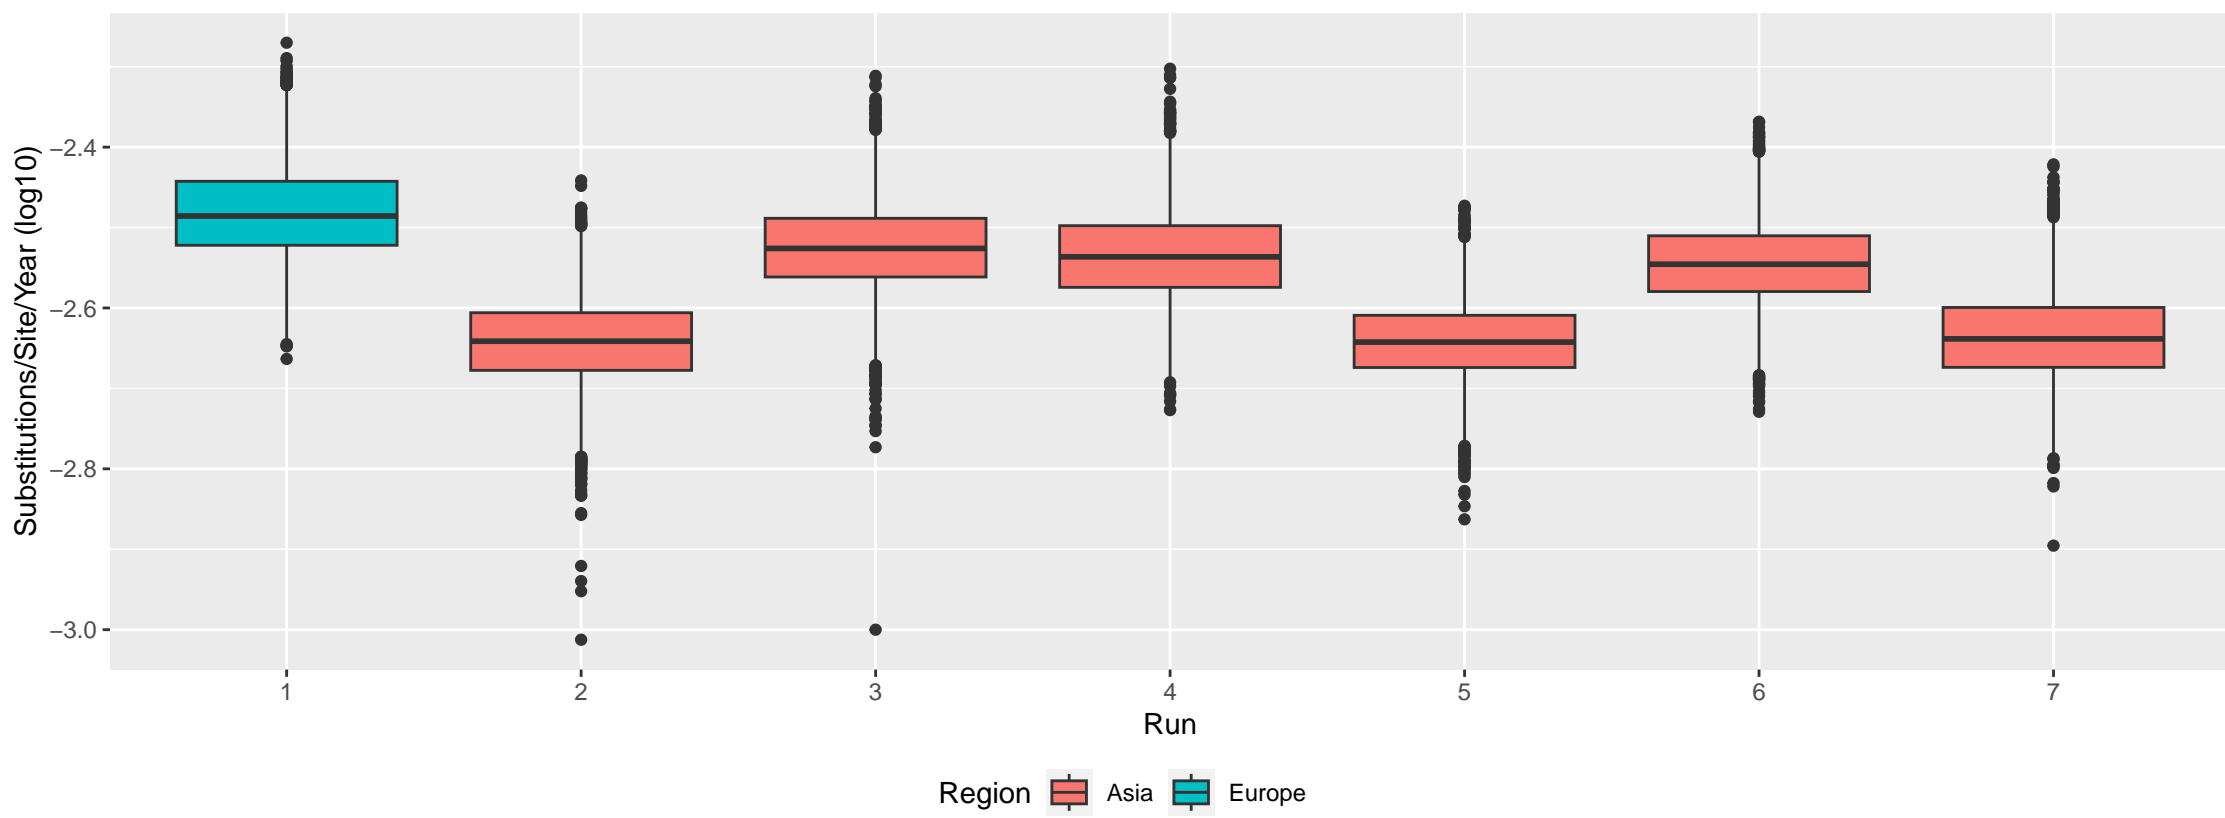

Supplement: s1 [file s1]

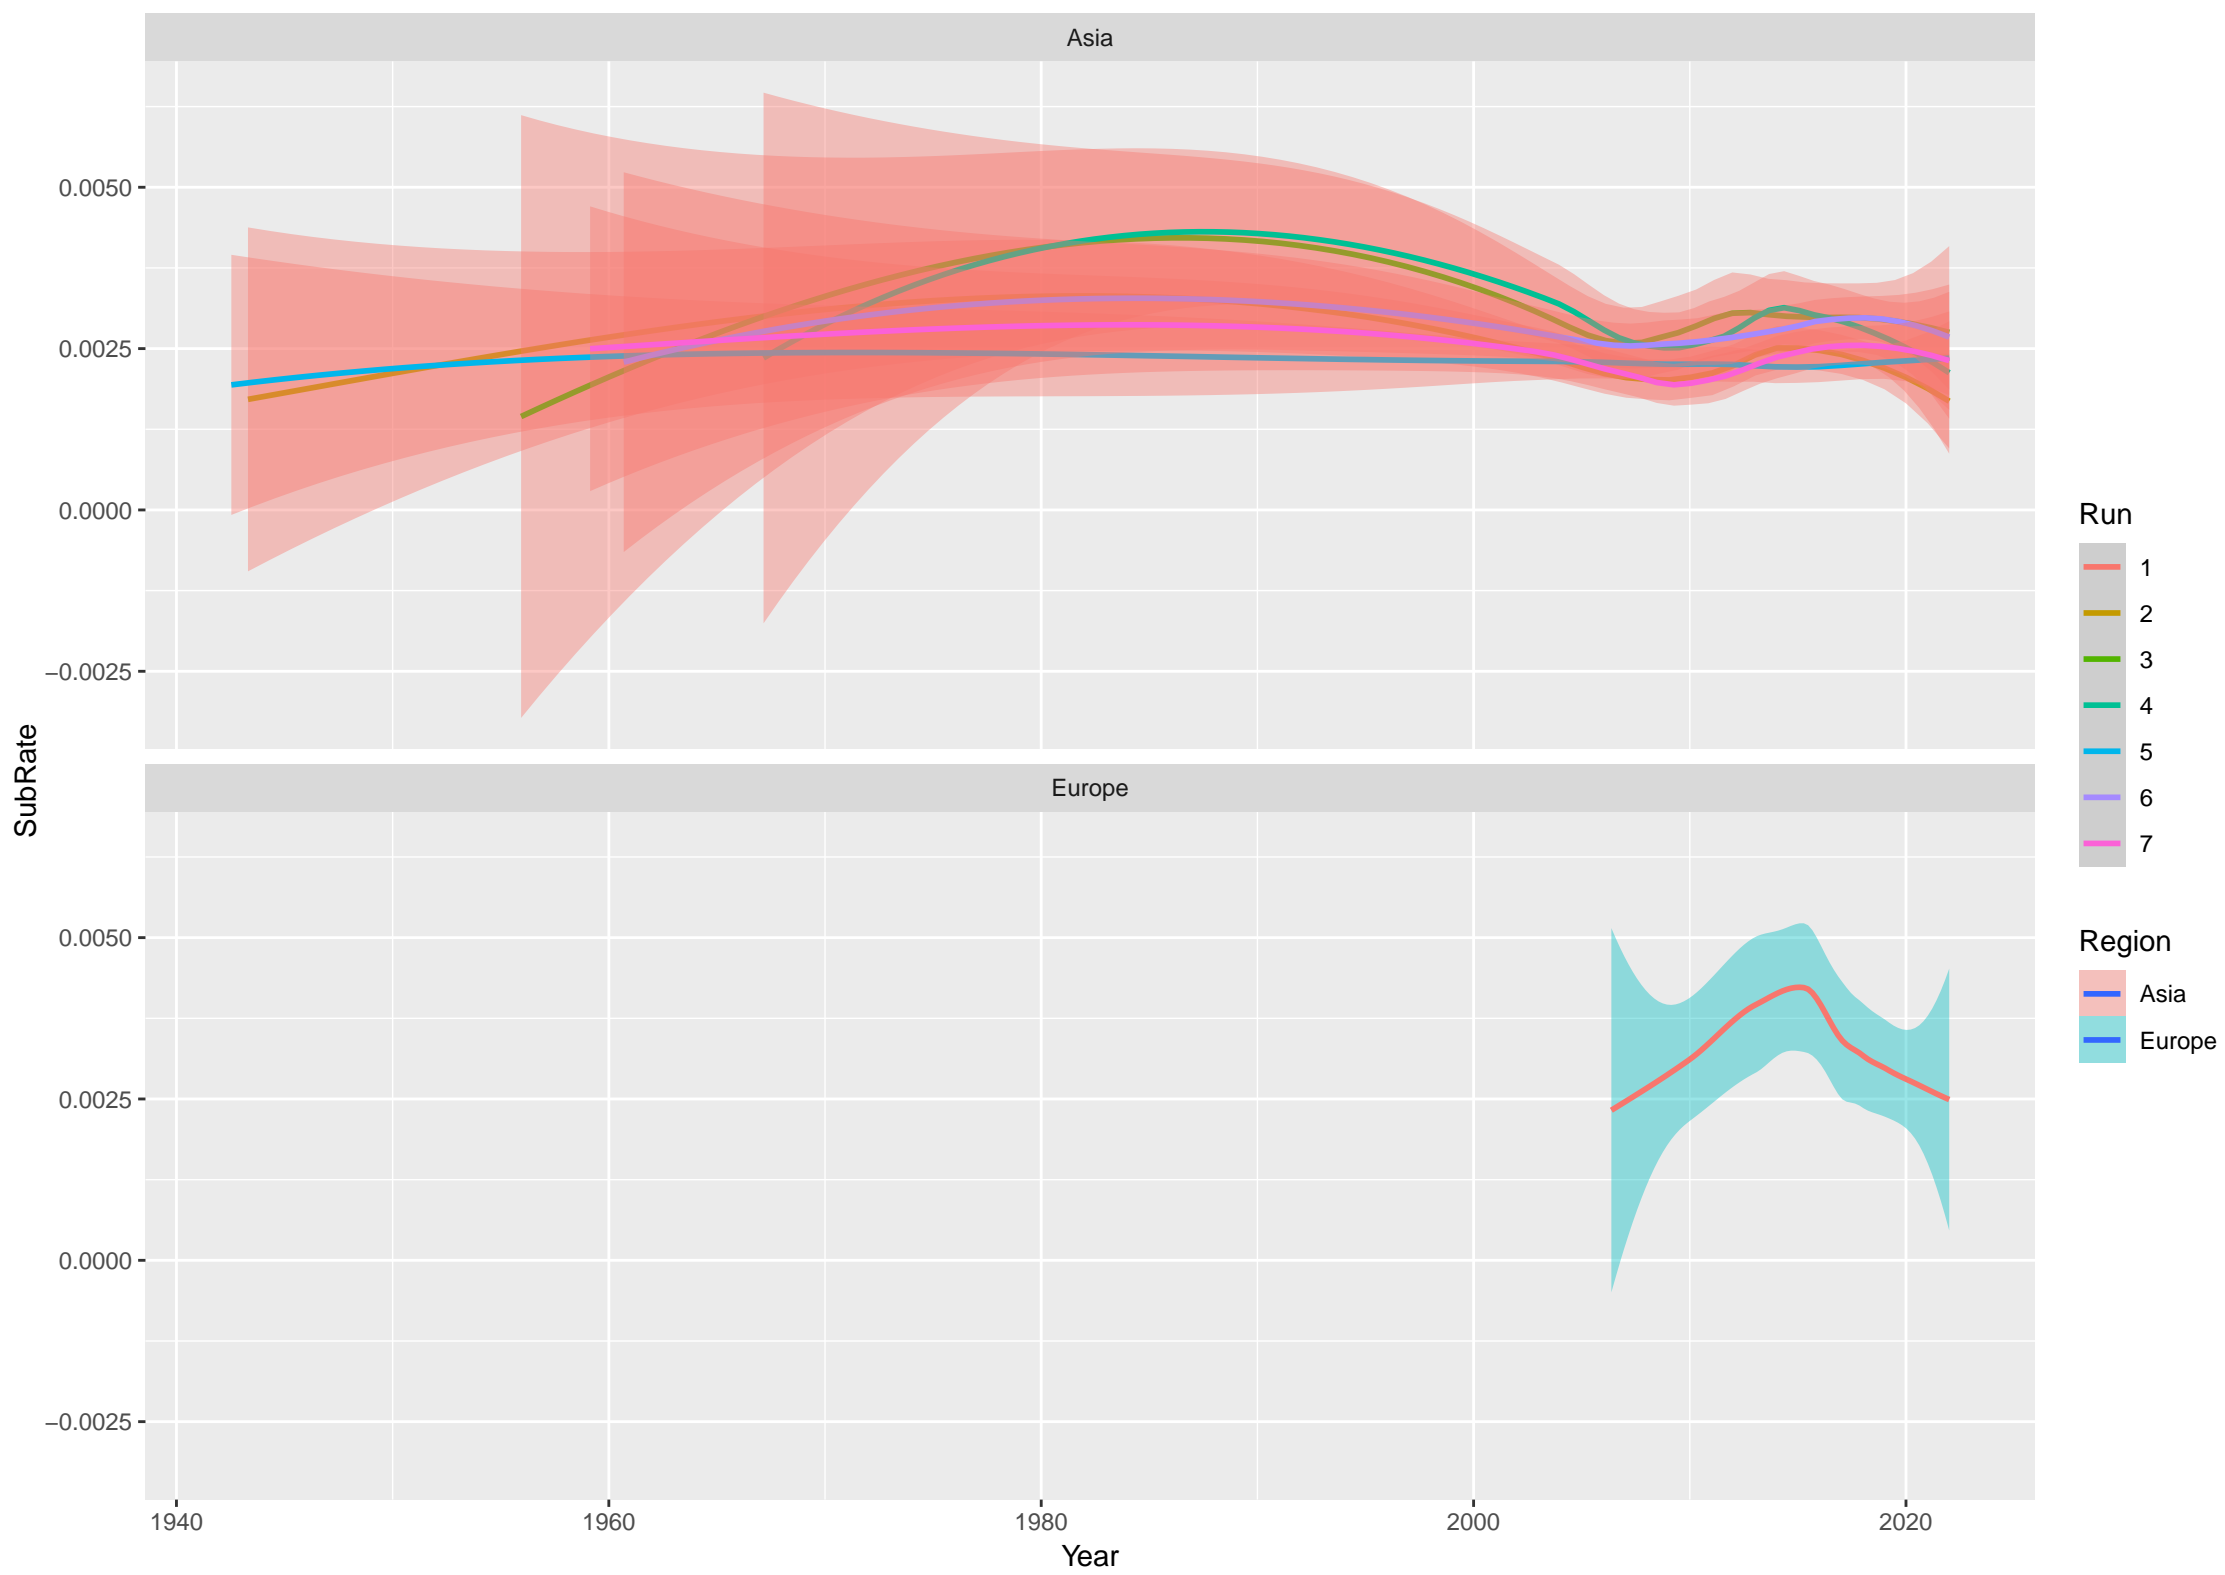

Supplement: s1 [file s1]
